# Supplementary material
Source: PubMed Central journal article supplement (PMC8406176)

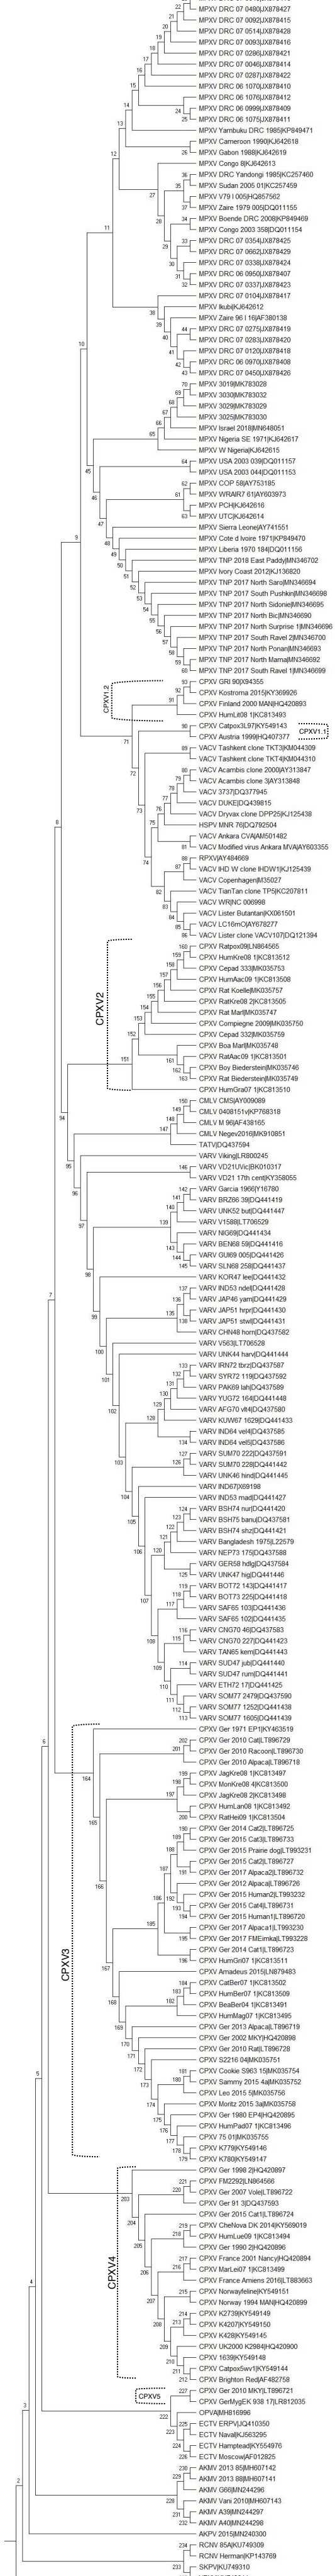

Fig. S2

Supplement: mbio.01495-21-sf002.pdf [file mbio.01495-21-sf002.pdf]
